# Supplementary material
Source: ML conference proceedings conference paper supplement (https://openreview.net/forum?id=TOP2MNW9Bp)

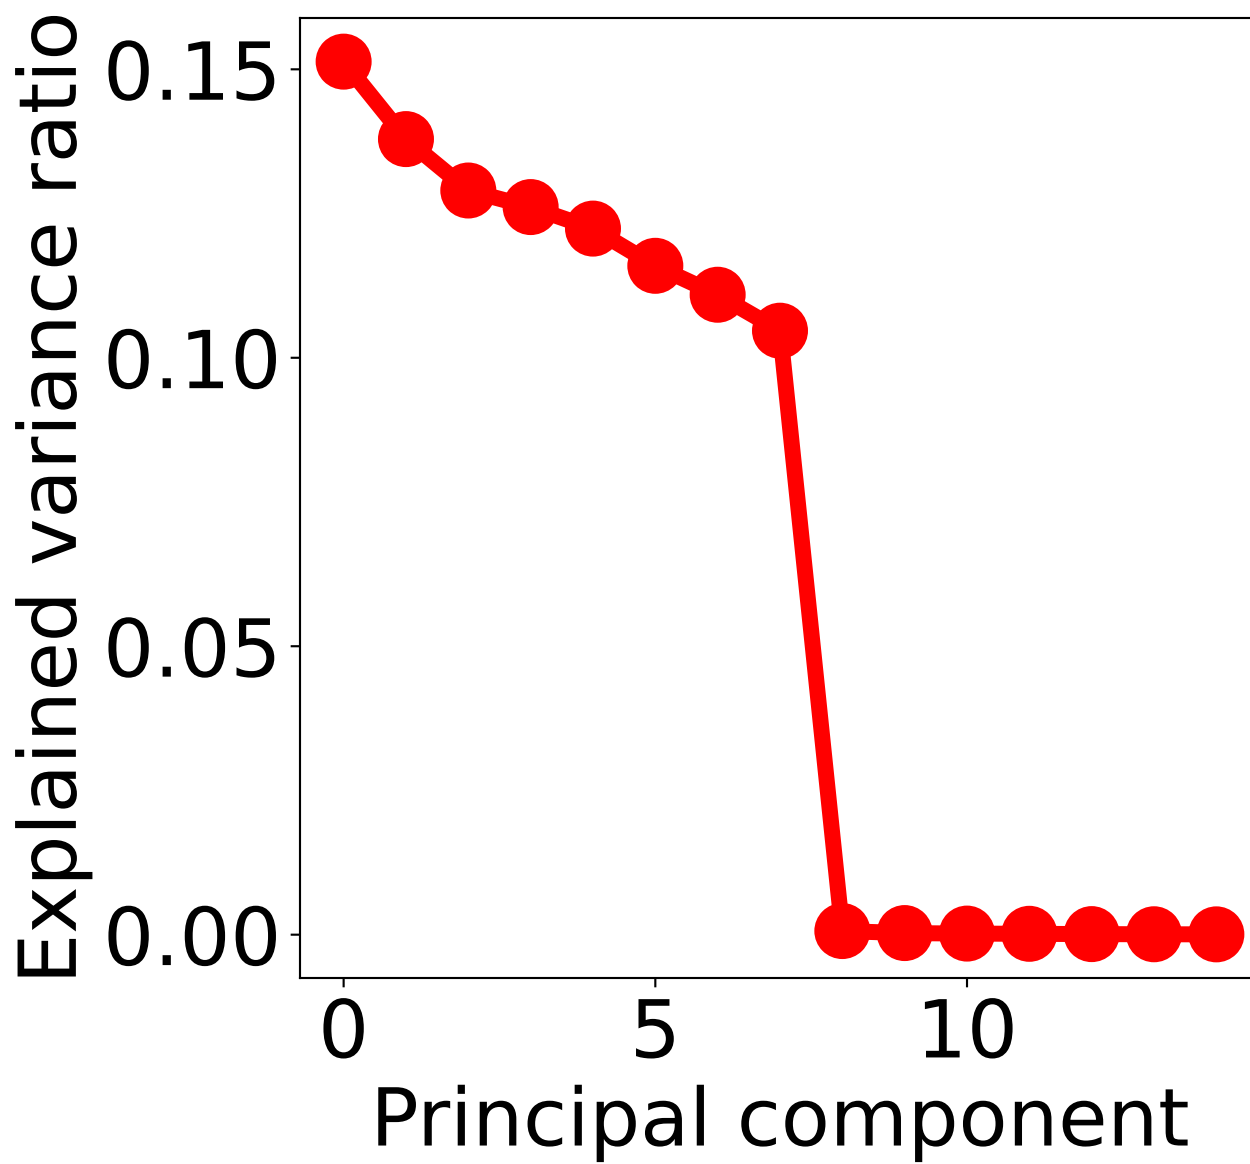

Supplement: supplementary_material [file phi_PCA_evr.pdf › supplemental/code_submit/gridworld/gridworld/phi_PCA_evr.pdf]

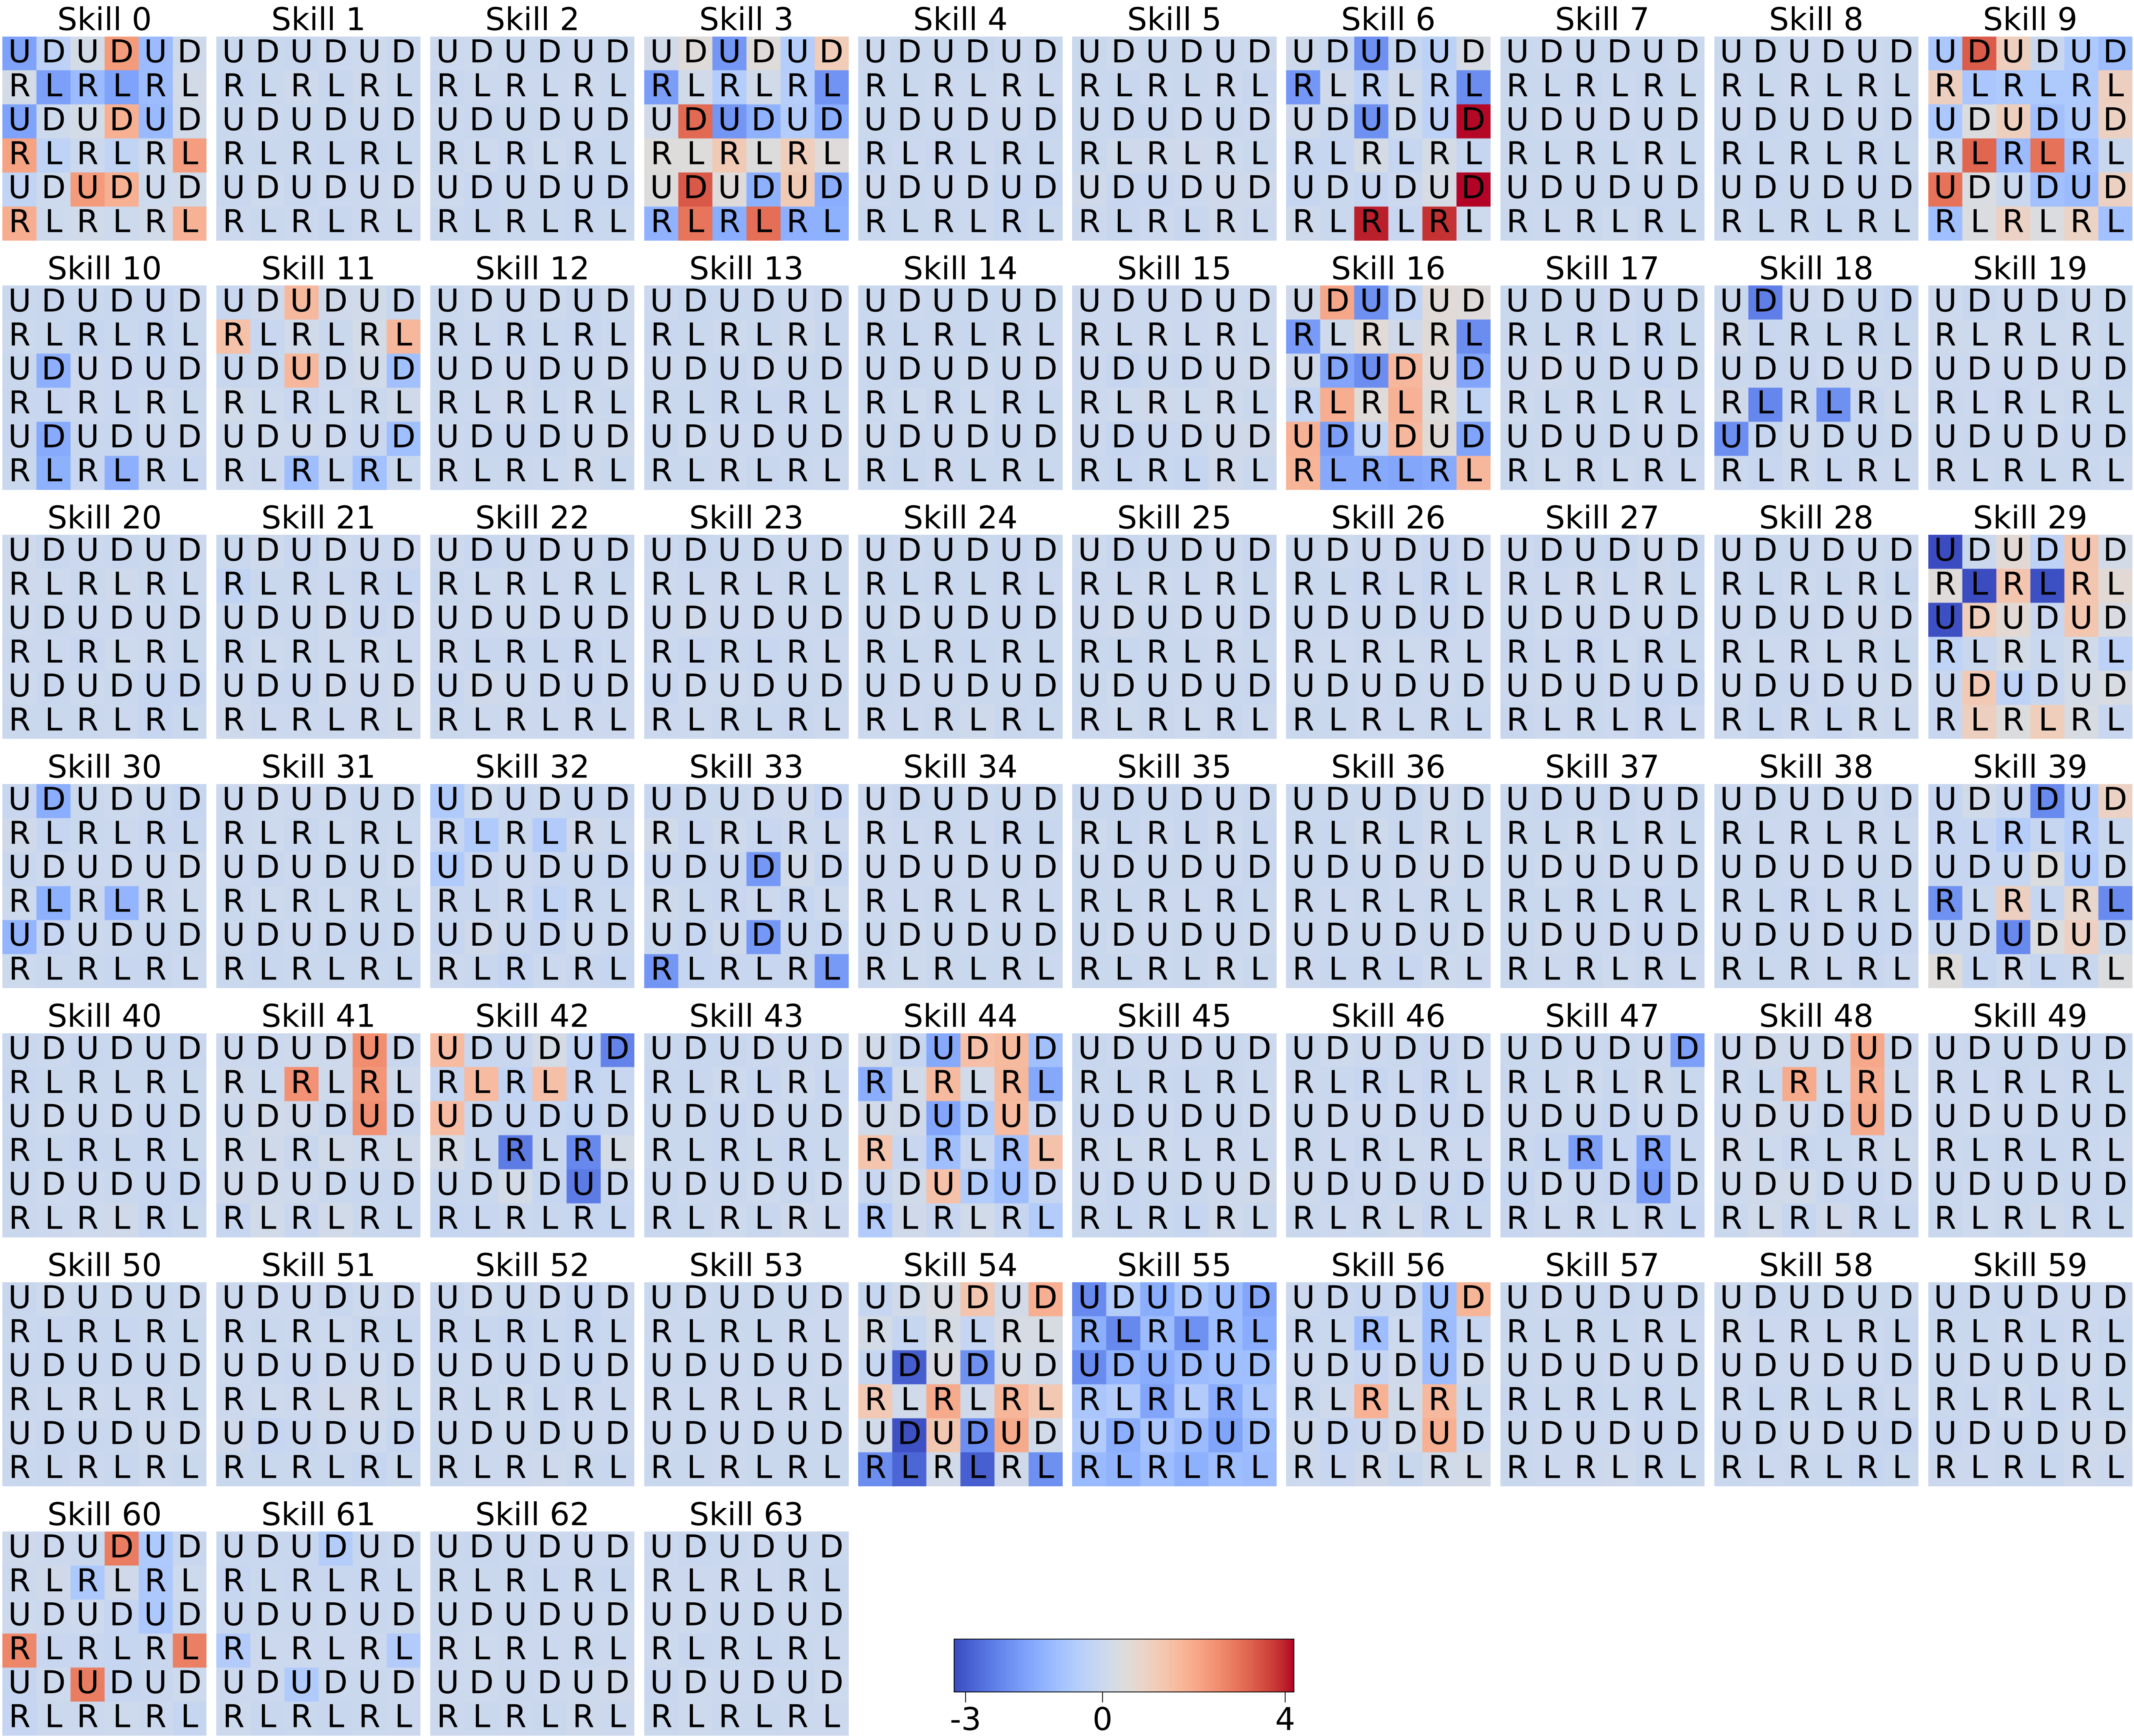

Supplement: supplementary_material [file phi_matrix.pdf › supplemental/code_submit/gridworld/gridworld/phi_matrix.pdf]

# Predict R

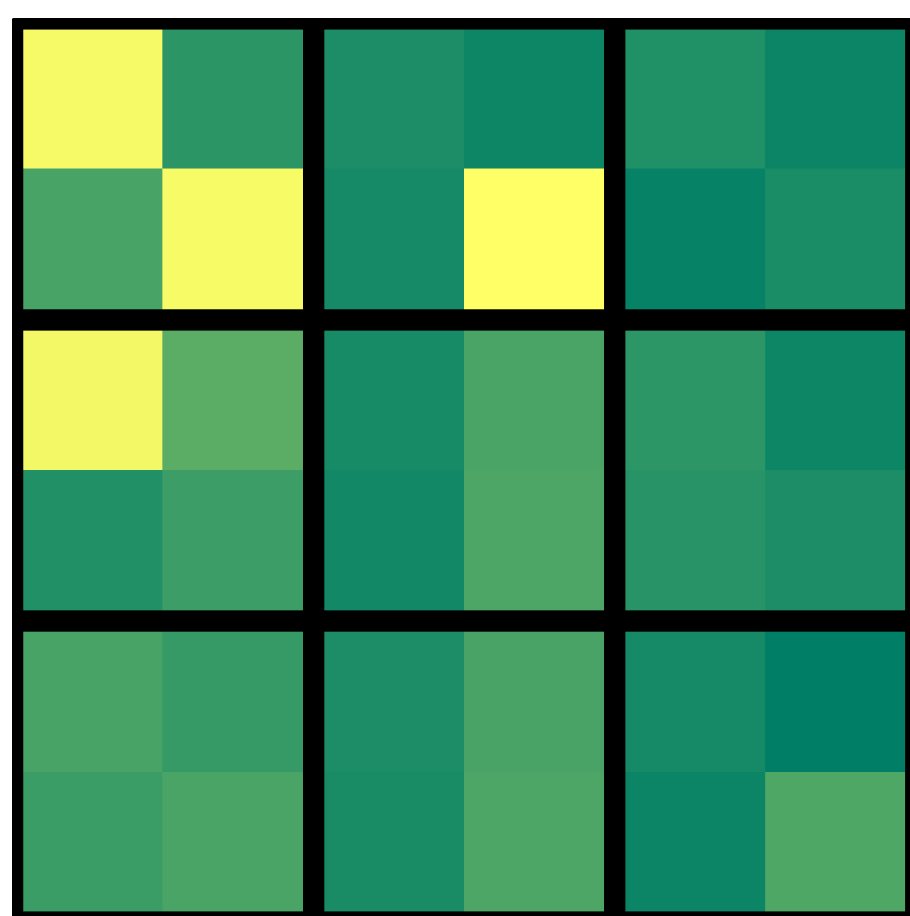

# Real R

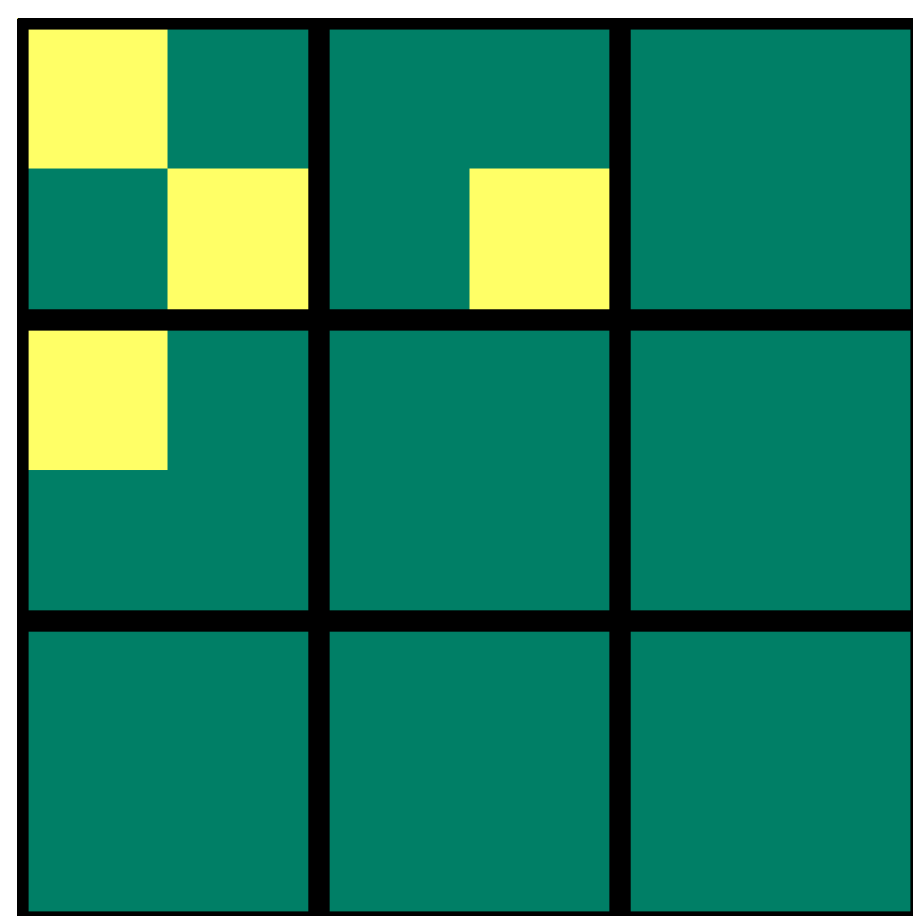

# Predict R

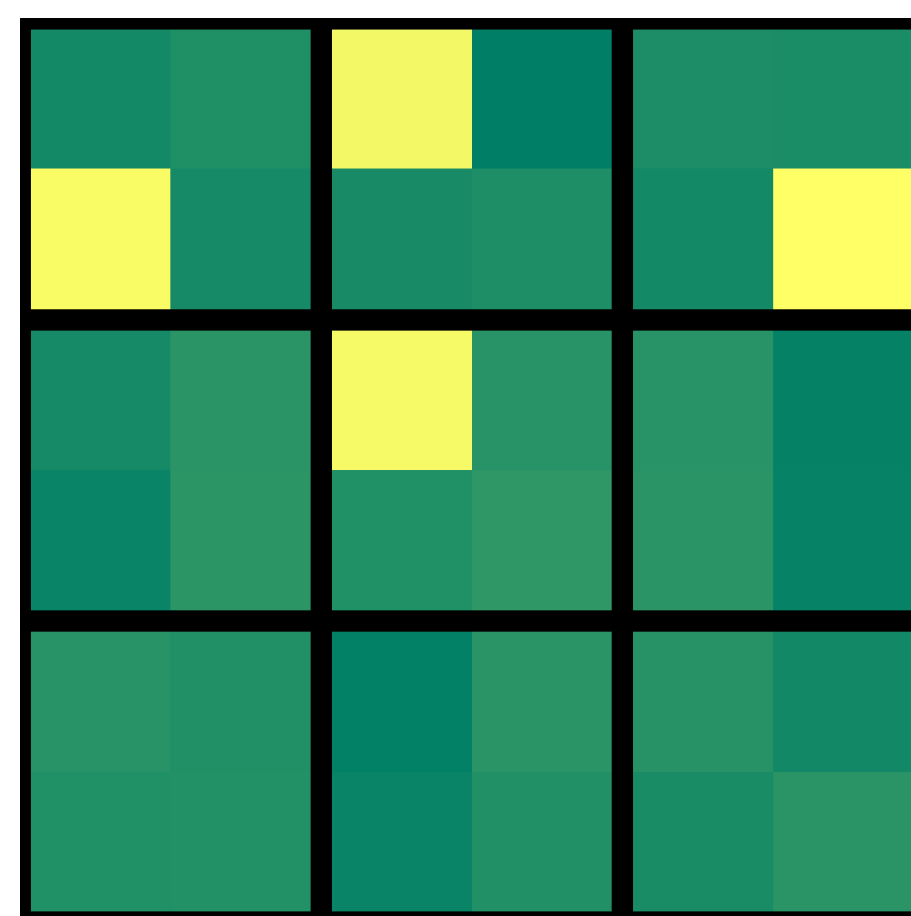

# Real R

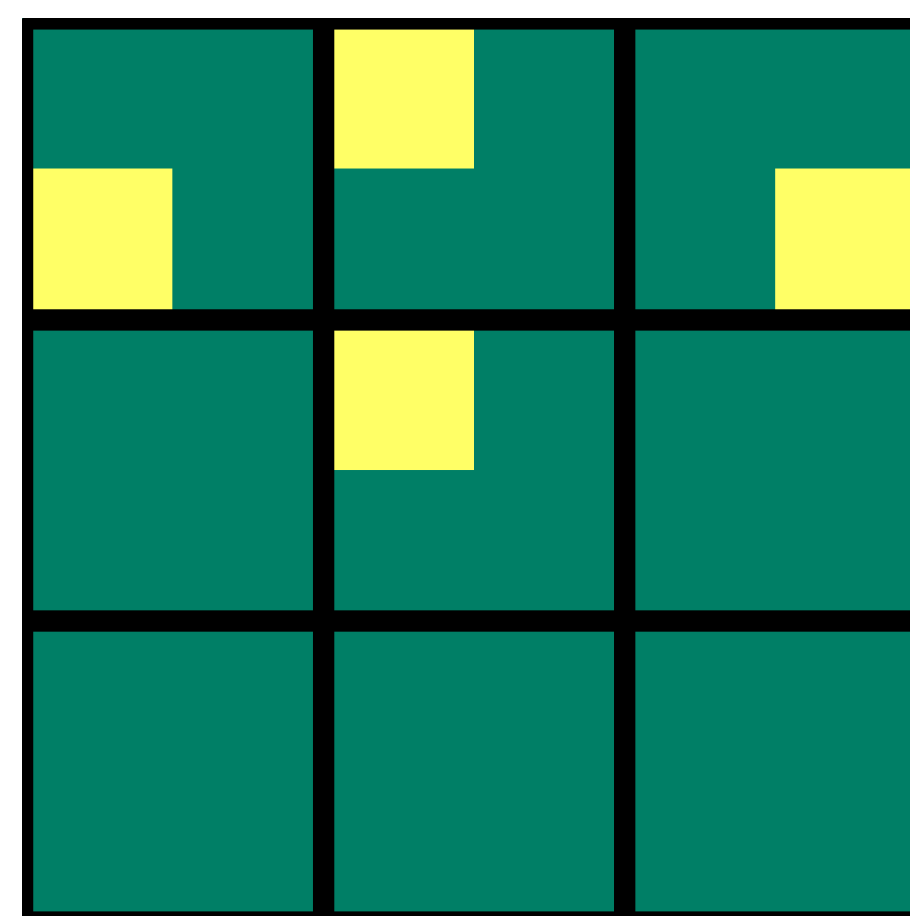

# Predict R

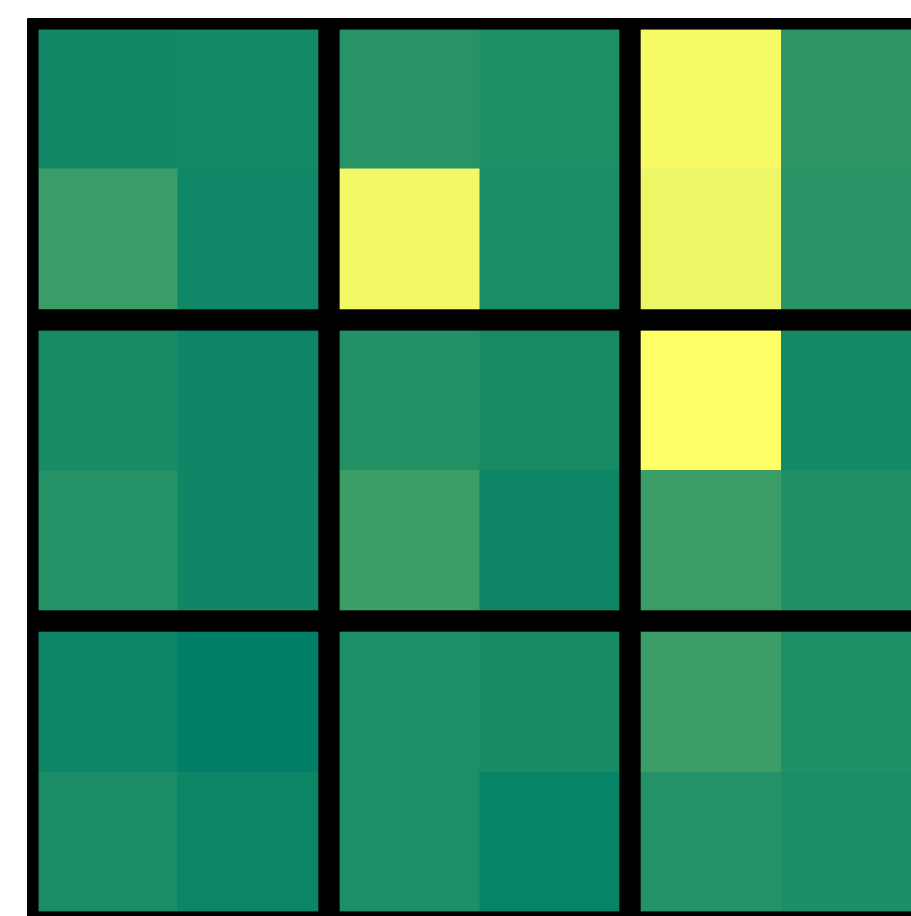

# Real R

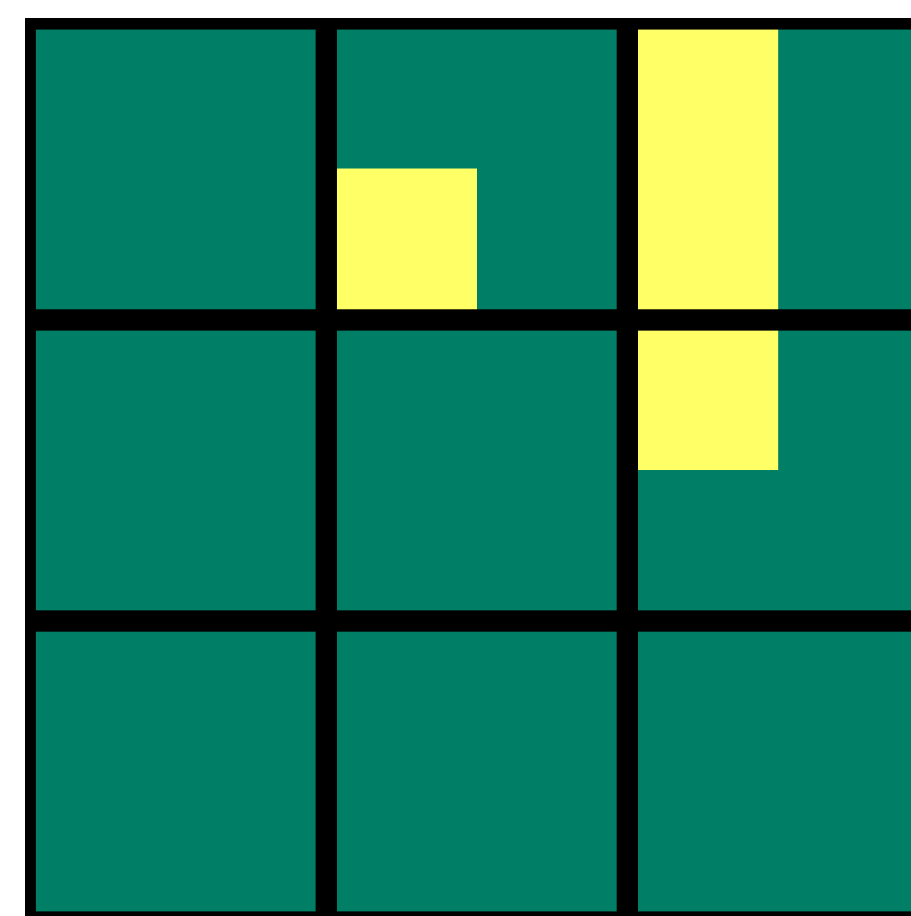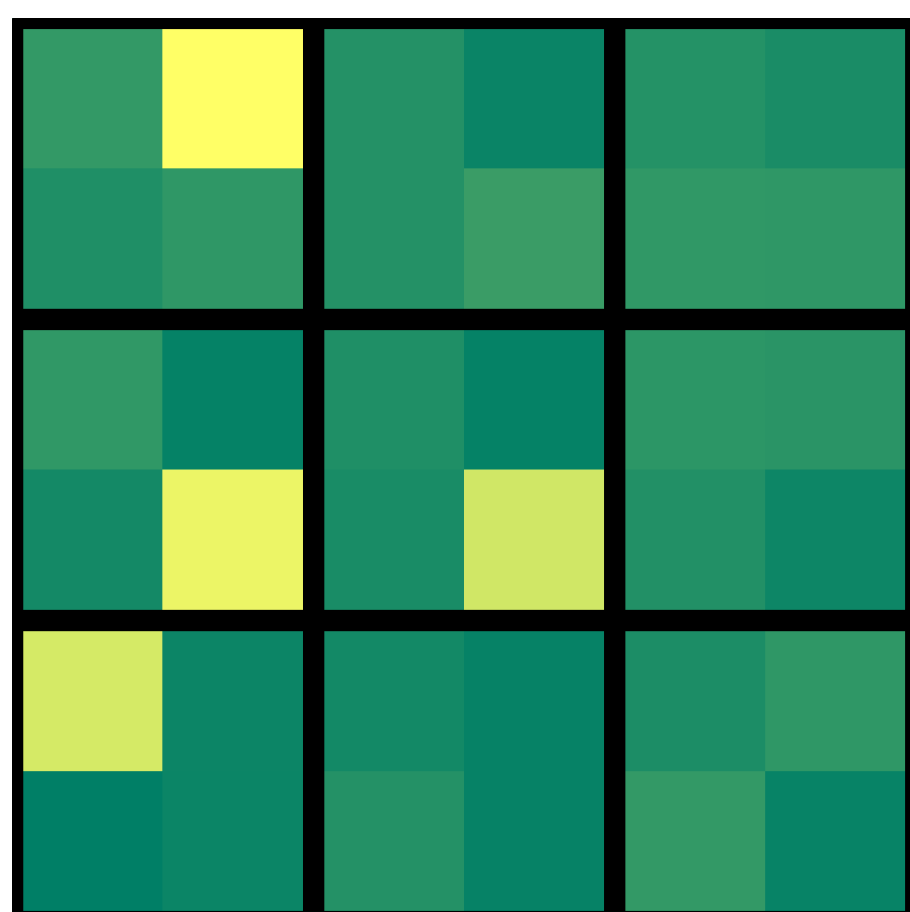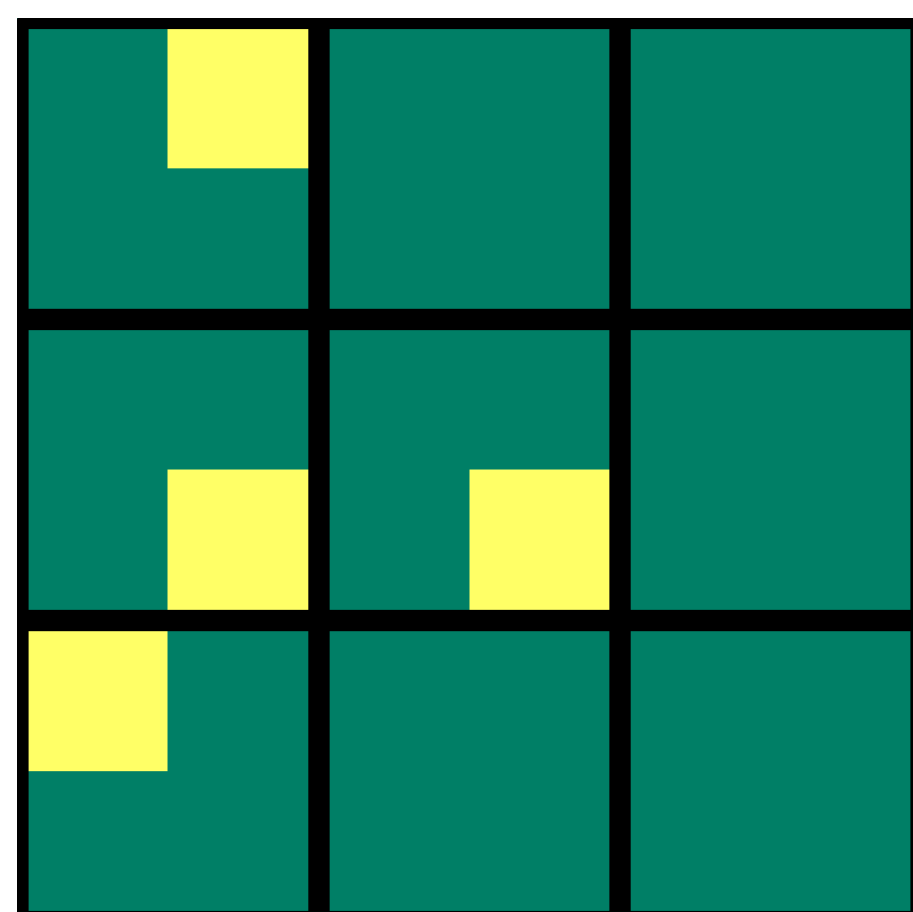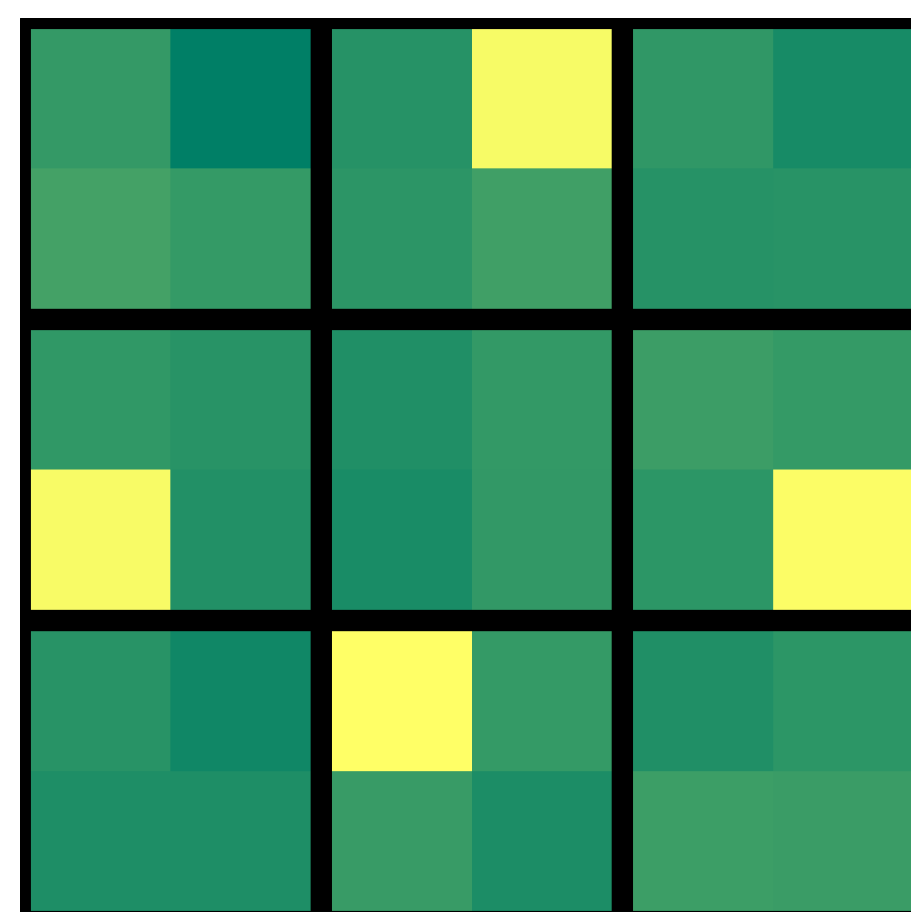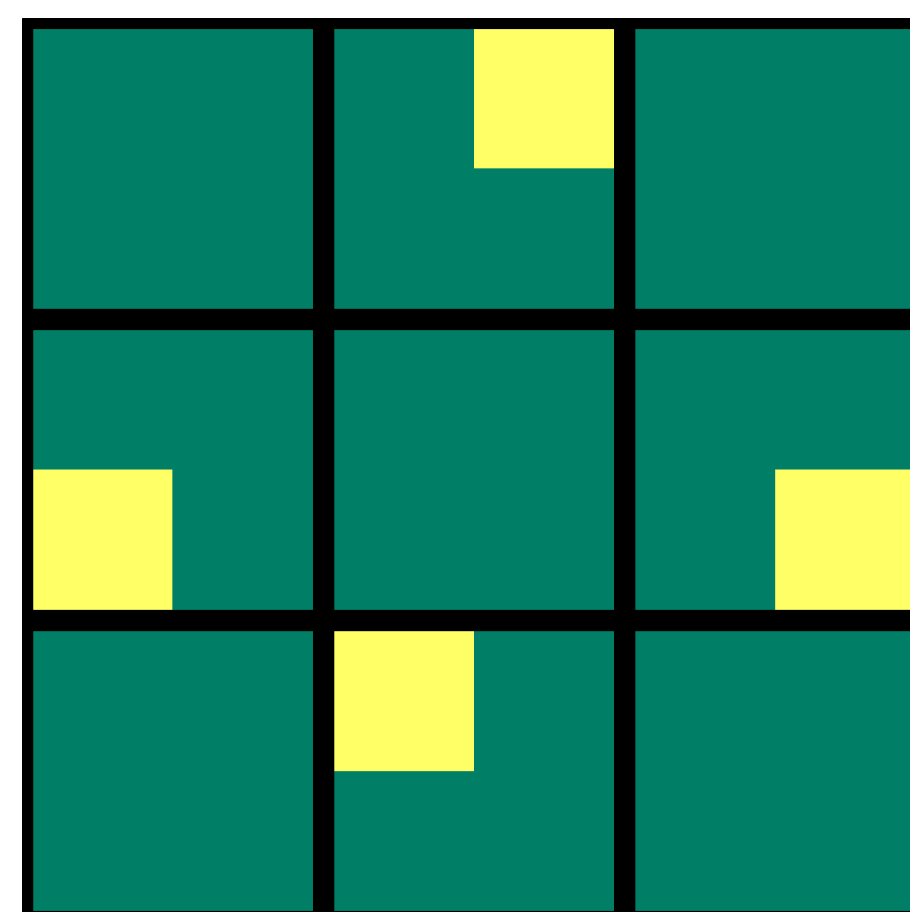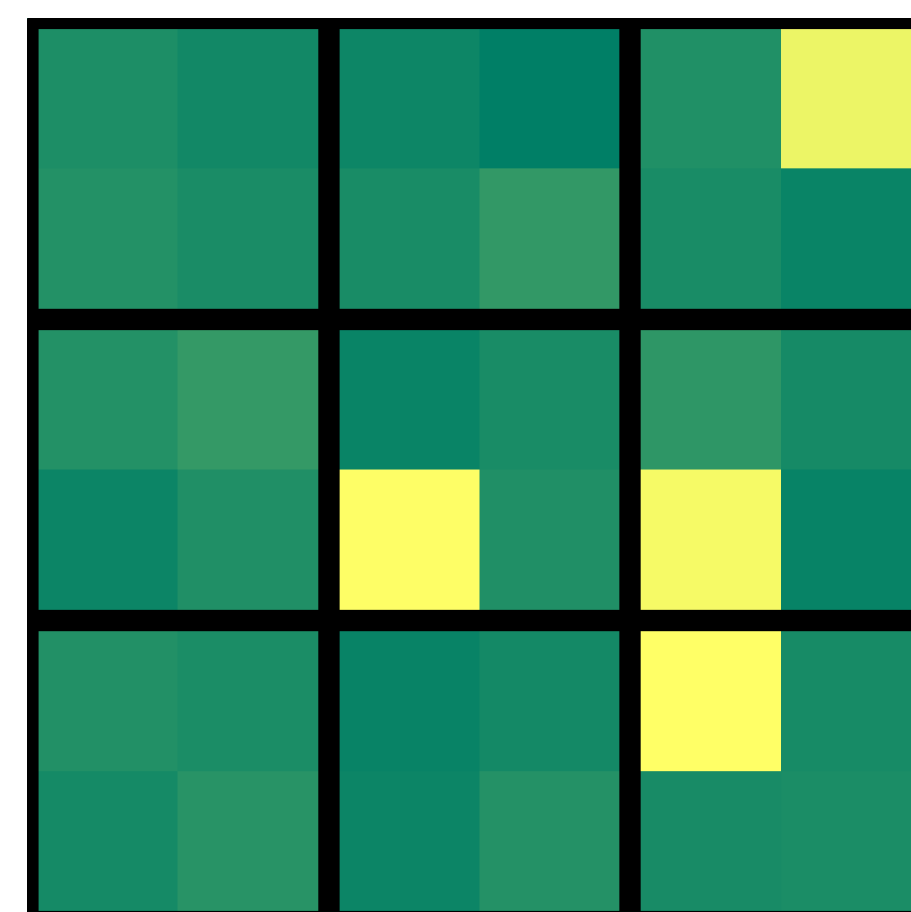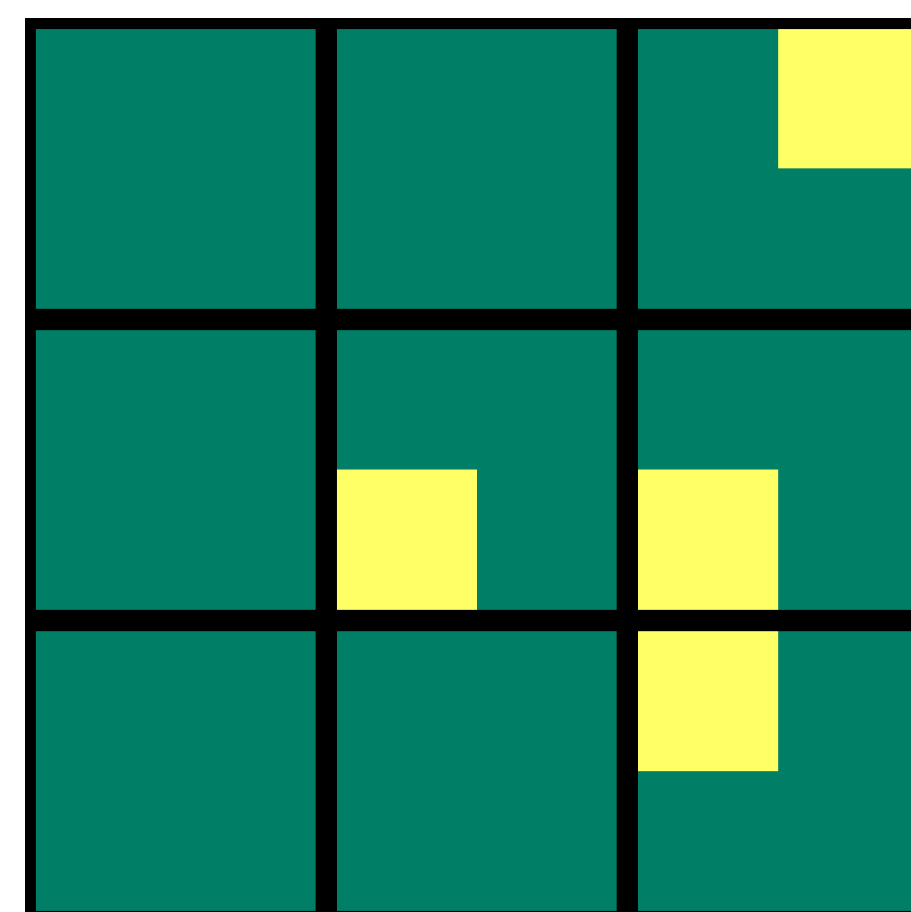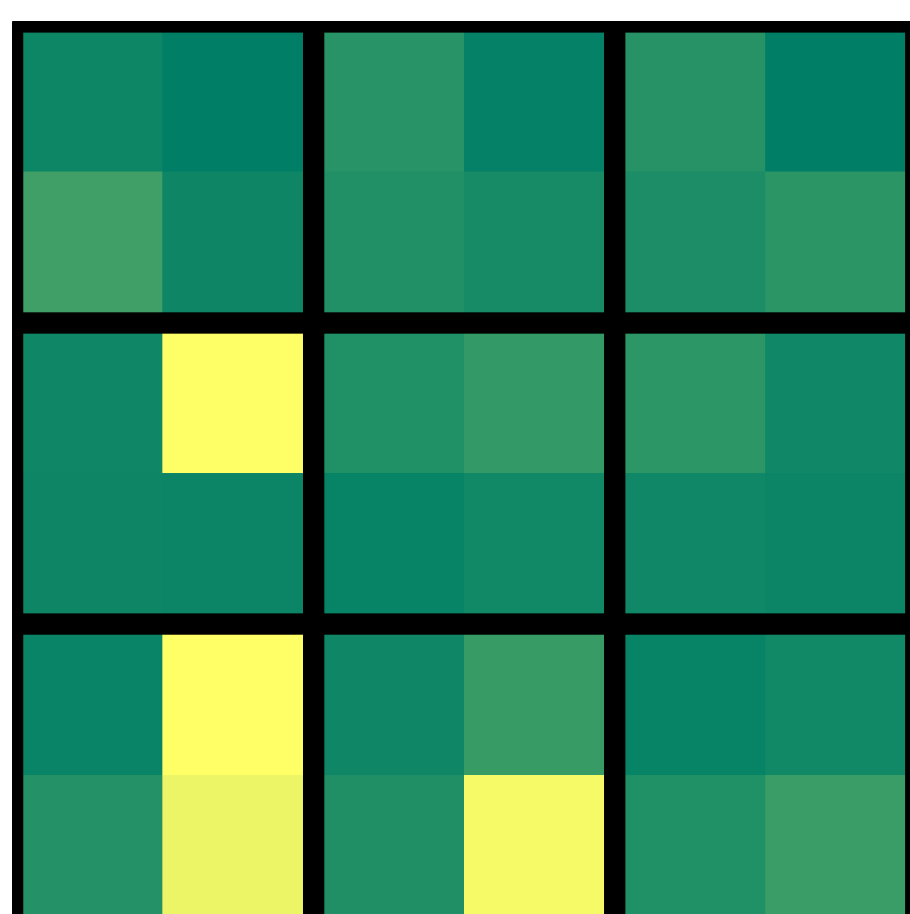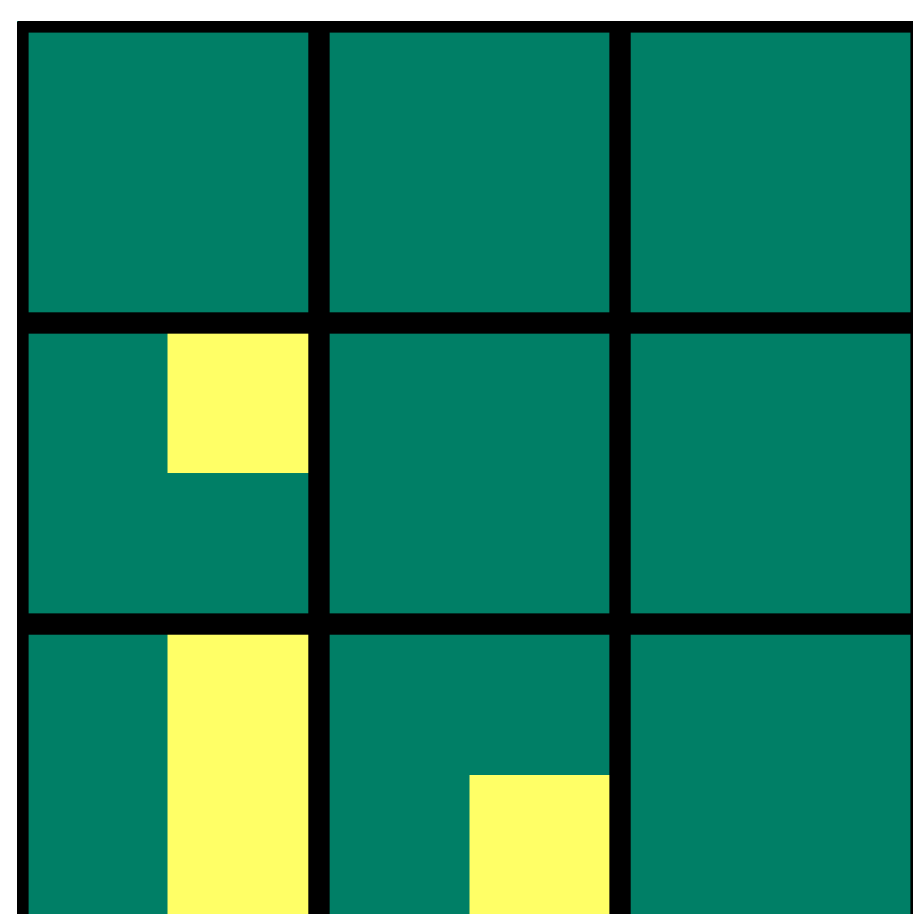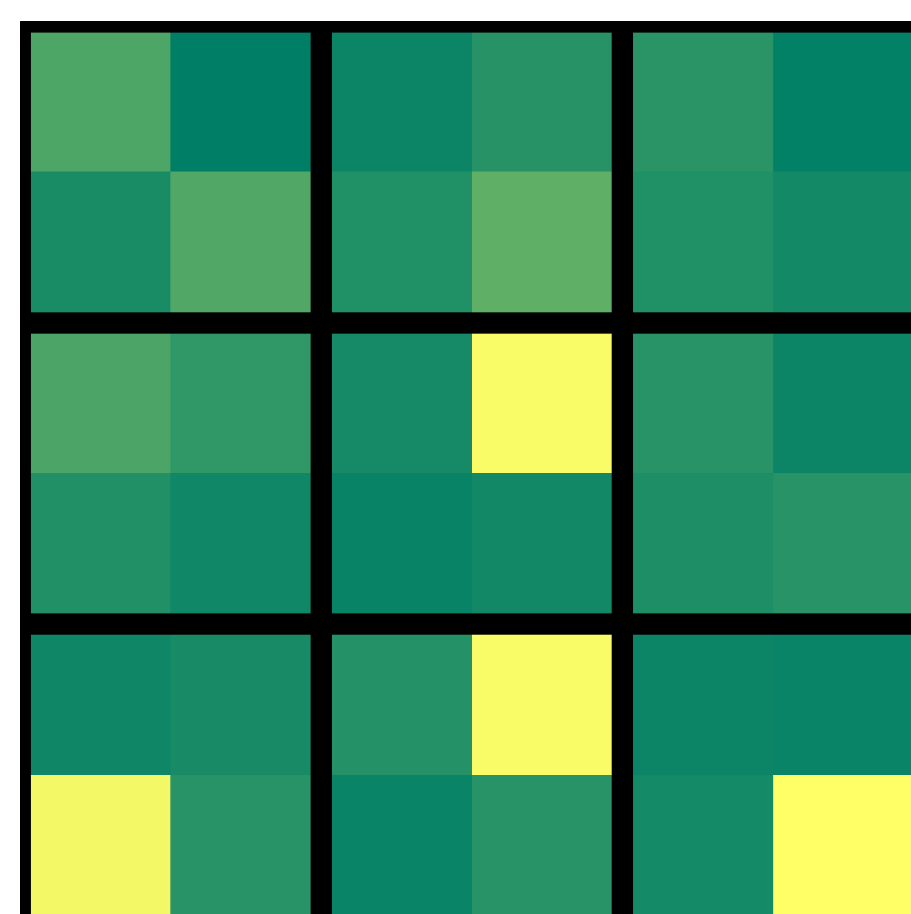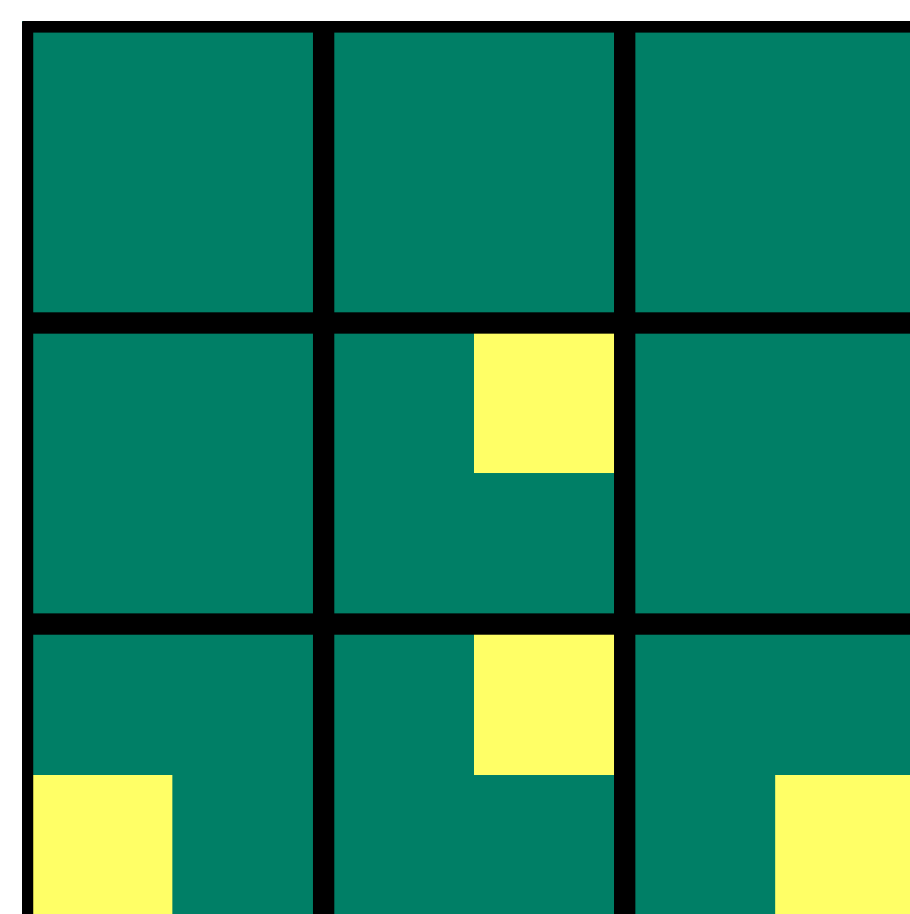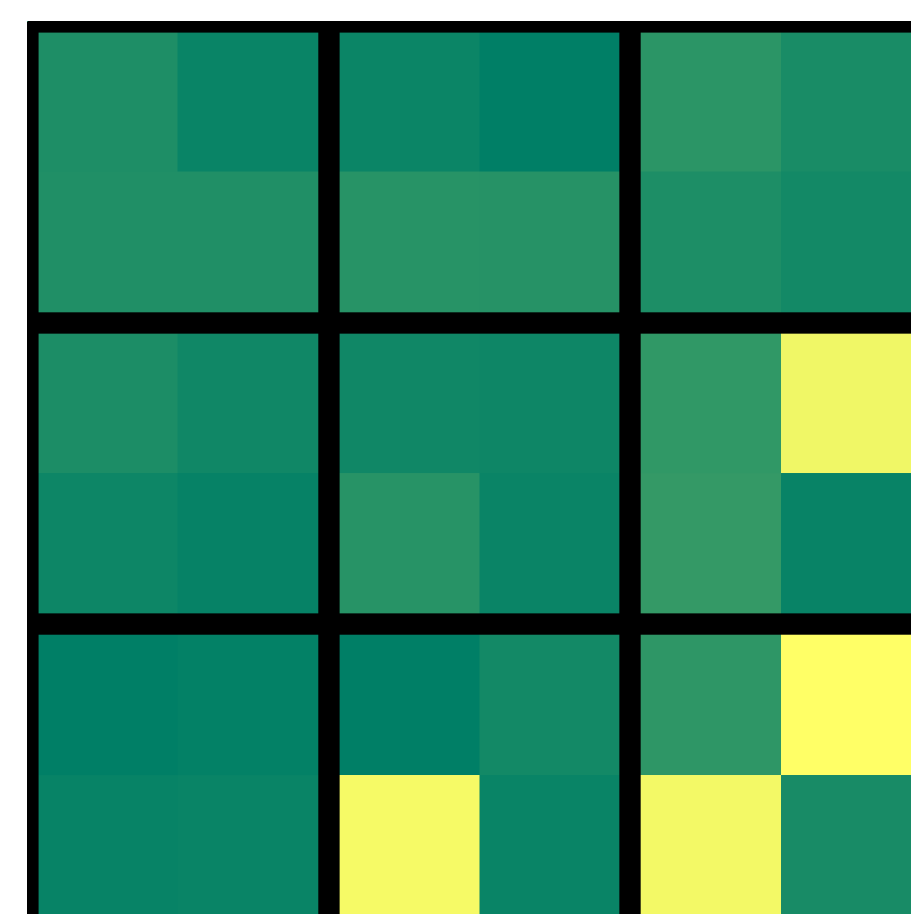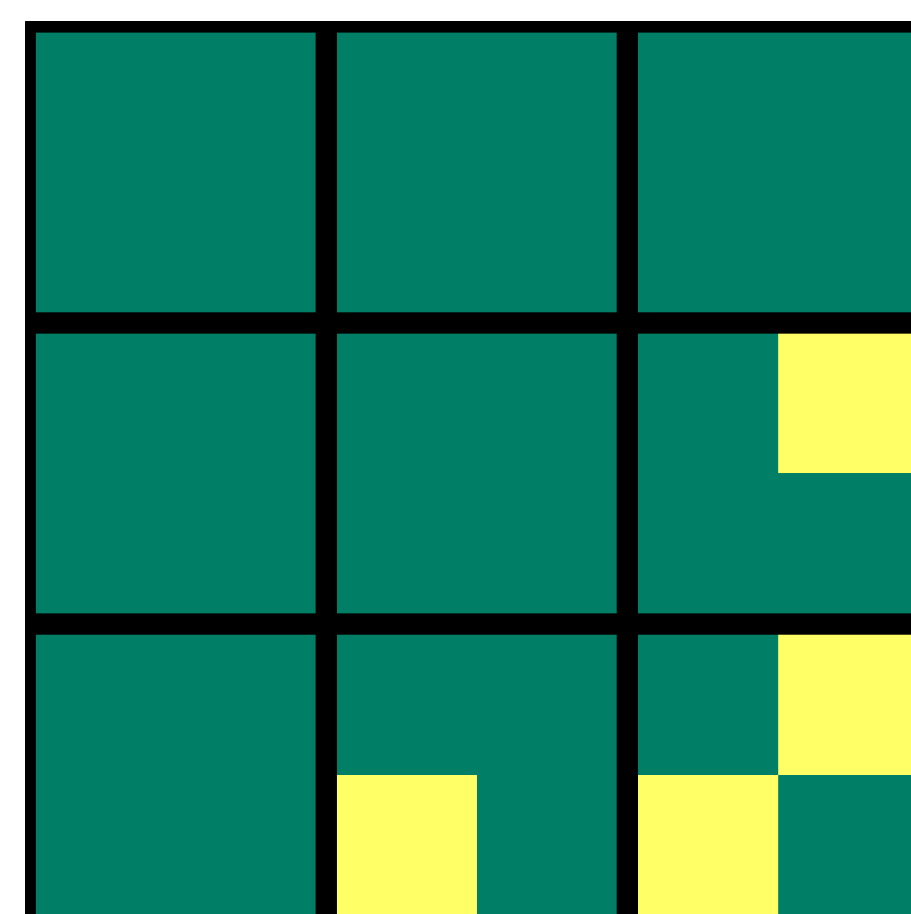

Supplement: supplementary_material [file pred_r_r.pdf › supplemental/code_submit/gridworld/gridworld/pred_r_r.pdf]

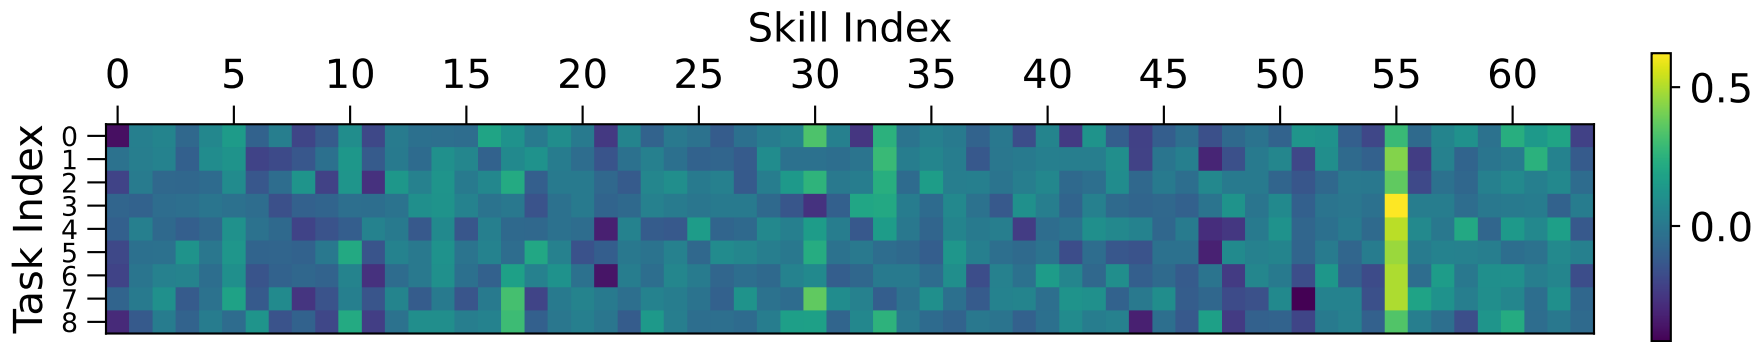

Supplement: supplementary_material [file w.pdf › supplemental/code_submit/gridworld/gridworld/w.pdf]

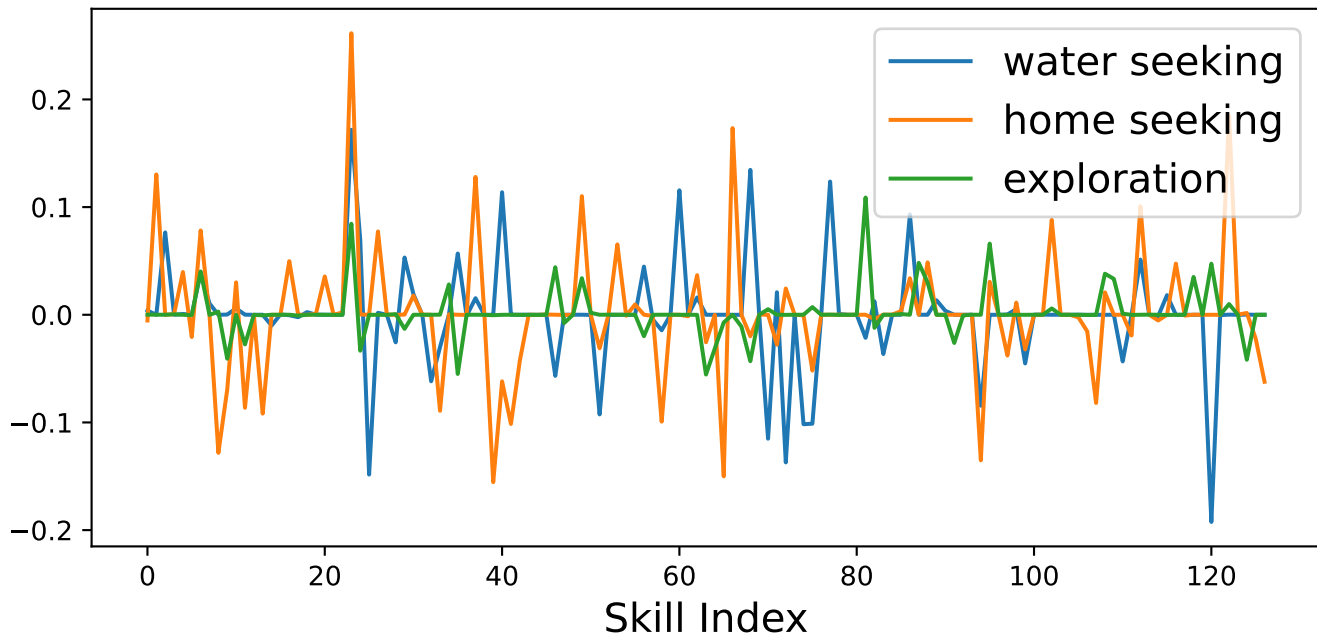

Supplement: supplementary_material [file w.pdf › supplemental/code_submit/labyrinth/irl_figure/labyrinth/spedersac/network_127_l1norm_02/0/w.pdf]

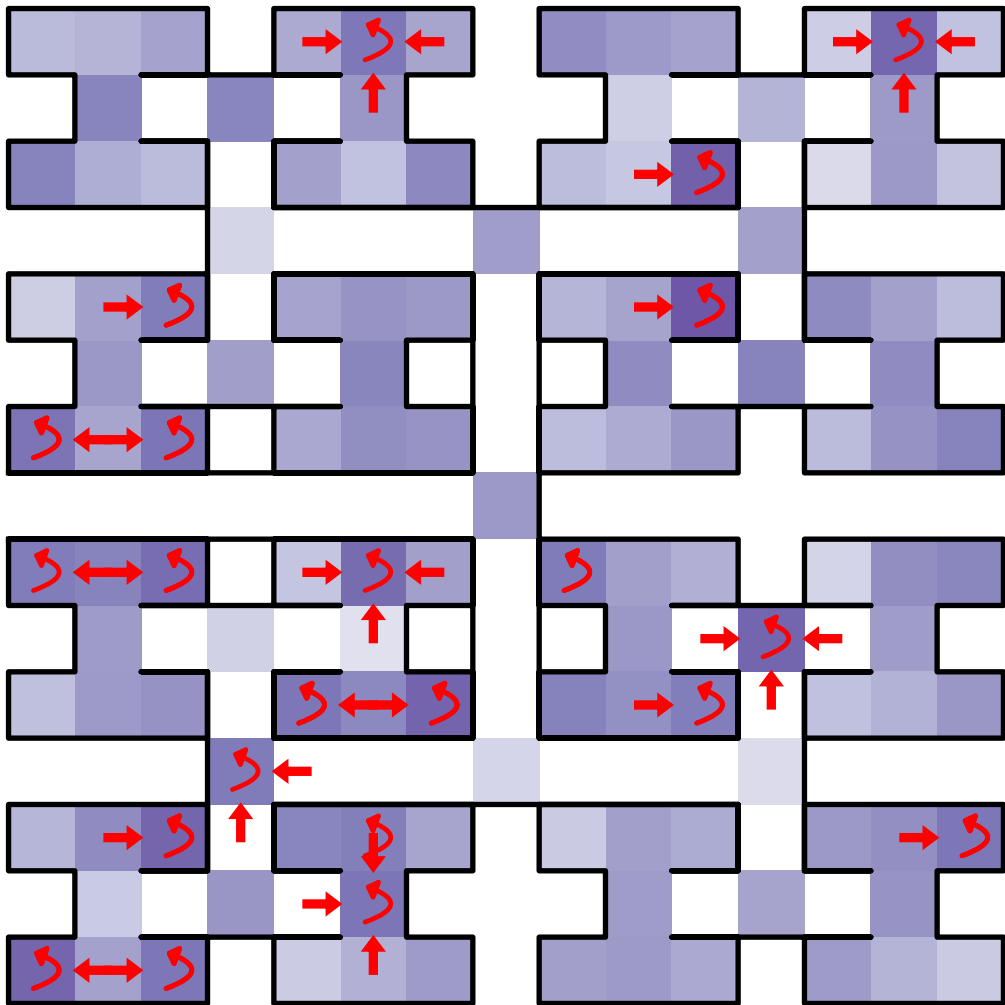

Supplement: supplementary_material [file origin_phi_0_80.pdf › supplemental/code_submit/labyrinth/labyrinth/appendix/origin_phi_0_80.pdf]

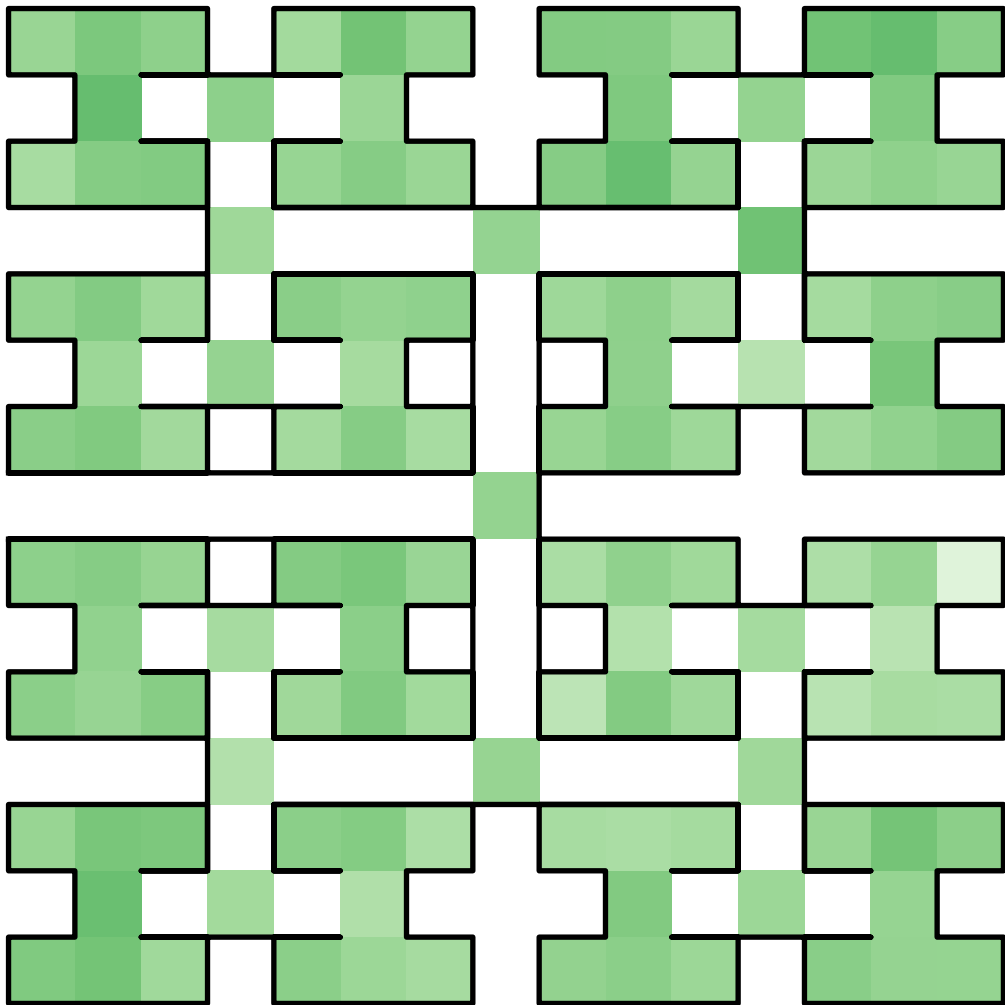

Supplement: supplementary_material [file exploration_reward2.pdf › supplemental/code_submit/labyrinth/labyrinth/exploration_reward2.pdf]

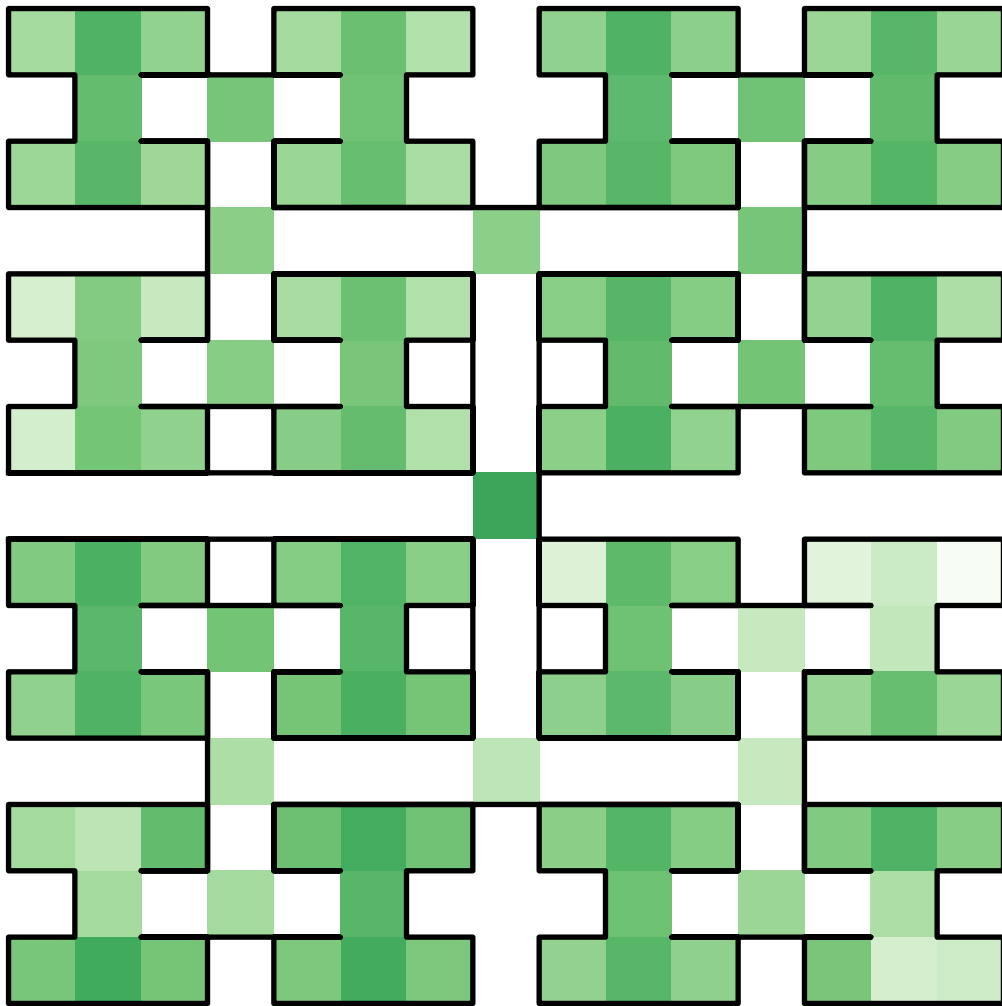

Supplement: supplementary_material [file ground_truth_reward2.pdf › supplemental/code_submit/labyrinth/labyrinth/ground_truth_reward2.pdf]
